# Supplementary material for: Personal Activity Intelligence and Ischemic Heart Disease in a Healthy Population: China Kadoorie Biobank Study
Source: MDPI journal article supplement (doi:10.3390/jcm11216552), 2022-11-04

## **Supplementary Materials**

Hammer et al. Personal Activity Intelligence and Ischemic Heart Disease in a Healthy Population:  
China Kadoorie Biobank Study

Table S1. Baseline characteristics of study participants according to ischemic heart disease status.

Table S2. Baseline characteristics of study participants according to myocardial infarction status.

Figure S1. Flow of participants in the study.

**Table S1.** Baseline characteristics of study participants according to ischemic heart disease status

| Ischemic Heart Disease (IHD)                    |                         |                 |                   |                    |                         |                 |                   |                    |
|-------------------------------------------------|-------------------------|-----------------|-------------------|--------------------|-------------------------|-----------------|-------------------|--------------------|
|                                                 | No                      |                 |                   |                    | Yes                     |                 |                   |                    |
|                                                 | Inactive<br>(n=124,676) | ≤50<br>(n=4210) | 51-99<br>(n=3065) | ≥100<br>(n=45,578) | Inactive<br>(n=199,490) | ≤50<br>(n=6183) | 51-99<br>(n=5355) | ≥100<br>(n=55,235) |
| Age, mean (SD), y                               | 50.4 (10.2)             | 51.2 (10.2)     | 51.6 (10.5)       | 54.8 (10.9)        | 49.7 (9.9)              | 50.3 (10.1)     | 51.2 (10.3)       | 53.9 (10.2)        |
| Urban residence, No. (%)                        | 45,496 (36.5)           | 2803 (66.6)     | 2057 (67.1)       | 26,516 (58.2)      | 71,212 (35.7)           | 4419 (71.5)     | 2901 (54.2)       | 37,711 (68.3)      |
| Body mass index, No. (%)                        |                         |                 |                   |                    |                         |                 |                   |                    |
| <18.5                                           | 4952 (4.0)              | 106 (2.5)       | 63 (2.1)          | 1668 (3.7)         | 8589 (4.3)              | 190 (3.1)       | 156 (2.9)         | 1663 (3.0)         |
| 18.5-24.9                                       | 82,323 (66.0)           | 2396 (56.9)     | 1802 (58.8)       | 28,289 (62.1)      | 125,609 (63.0)          | 3763 (60.8)     | 3354 (62.6)       | 32,741 (59.3)      |
| 25.0-29.9                                       | 33,868 (27.2)           | 1540 (36.6)     | 1086 (35.4)       | 14,187 (31.1)      | 56,522 (28.3)           | 1905 (30.8)     | 1594 (29.8)       | 17,773 (32.2)      |
| ≥30.0                                           | 3533 (2.8)              | 168 (4.0)       | 114 (3.7)         | 1434 (3.1)         | 8770 (4.4)              | 325 (5.3)       | 251 (4.7)         | 3058 (5.5)         |
| Systolic BP, mean (SD), mmHg                    | 131.9 (19.6)            | 131.6 (19.2)    | 131.5 (19.6)      | 132.9 (19.9)       | 129.2 (21.7)            | 125.8 (21.5)    | 128.7 (22.5)      | 129.5 (21.8)       |
| Diastolic BP, mean (SD), mmHg                   | 79.4 (11.4)             | 79.5 (11.3)     | 79.0 (11.2)       | 78.6 (11.2)        | 76.9 (10.6)             | 75.3 (10.8)     | 75.9 (11.2)       | 76.1 (10.7)        |
| Education level, No. (%)                        |                         |                 |                   |                    |                         |                 |                   |                    |
| No formal education                             | 11,454 (9.2)            | 99 (2.4)        | 93 (3.0)          | 2895 (6.3)         | 54,561 (27.3)           | 632 (10.2)      | 995 (18.6)        | 9400 (17.0)        |
| Primary school                                  | 42,009 (33.7)           | 800 (19.0)      | 610 (19.9)        | 13,428 (29.5)      | 65,377 (32.8)           | 1251 (20.2)     | 1366 (25.5)       | 15,151 (27.4)      |
| Middle or high school                           | 64,563 (51.8)           | 2582 (61.3)     | 1696 (55.3)       | 23,503 (51.6)      | 72,960 (36.6)           | 3476 (56.2)     | 2523 (47.1)       | 26,872 (48.7)      |
| College or university                           | 6651 (5.3)              | 729 (17.3))     | 666 (21.7)        | 5752 (12.6)        | 6592 (3.3)              | 824 (13.3)      | 471 (8.8)         | 3812 (6.9)         |
| Smoking status, No. (%)                         |                         |                 |                   |                    |                         |                 |                   |                    |
| Never                                           | 29,821 (23.9)           | 1356 (32.2)     | 977 (31.9)        | 13,898 (30.5)      | 194,204 (97.4)          | 6010 (97.2)     | 5193 (97.0)       | 53,725 (97.3)      |
| Former                                          | 16,545 (13.3)           | 686 (16.3)      | 531 (17.3)        | 8191 (18.0)        | 1362 (0.7)              | 59 (1.0)        | 62 (1.1)          | 550 (1.0)          |
| Current                                         | 78,310 (62.8)           | 2168 (51.5)     | 1557 (50.8)       | 23,489 (51.5)      | 3924 (1.9)              | 114 (1.8)       | 100 (1.9)         | 960 (1.7)          |
| Regular alcohol intake, No. (%)                 |                         |                 |                   |                    |                         |                 |                   |                    |
| Yes                                             | 44,098 (35.4)           | 1431 (34.0)     | 1025 (33.4)       | 14,302 (31.4)      | 3854 (1.9)              | 161 (2.6)       | 117 (2.2)         | 1263 (2.3)         |
| No                                              | 80,578 (64.6)           | 2779 (66.0)     | 2040 (66.6)       | 31,276 (68.6)      | 195,636 (98.1)          | 6022 (97.4)     | 5238 (97.8)       | 53,972 (97.7)      |
| Household income, yuan/yr, No. (%) <sup>b</sup> |                         |                 |                   |                    |                         |                 |                   |                    |
| <10,000                                         | 32,757 (26.3)           | 782 (18.6)      | 529 (17.3)        | 10,178 (22.3)      | 61,082 (30.6)           | 1263 (20.4)     | 1742 (32.5)       | 13,346 (24.1)      |
| 10,000-19,999                                   | 35,516 (28.5)           | 1171 (27.8)     | 849 (27.7)        | 12,638 (27.7)      | 59,230 (29.7)           | 1968 (31.8)     | 1505 (28.1)       | 16,219 (29.4)      |
| 20,000-34,999                                   | 31,067 (24.9)           | 1173 (27.9)     | 831 (27.1)        | 13,038 (28.6)      | 47,017 (23.6)           | 1648 (26.7)     | 1176 (22.0)       | 15,746 (28.5)      |
| ≥35,000                                         | 25,336 (20.3)           | 1084 (25.7)     | 856 (27.9)        | 9724 (21.3)        | 32,161 (16.1)           | 1304 (21.1)     | 932 (17.4)        | 9924 (18.0)        |
| Self-rated health status, No. (%)               |                         |                 |                   |                    |                         |                 |                   |                    |
| Excellent                                       | 26,538 (21.3)           | 889 (21.1)      | 780 (25.4)        | 9910 (21.7)        | 33,486 (16.8)           | 1123 (18.2)     | 795 (14.9)        | 9495 (17.2)        |
| Good/Fair                                       | 89,367 (71.7)           | 3022 (71.8)     | 2090 (68.2)       | 32,941 (72.3)      | 145,998 (73.2)          | 4504 (72.8)     | 3981 (74.3)       | 41,473 (75.1)      |
| Poor                                            | 8771 (7.0)              | 299 (7.1)       | 195 (6.4)         | 2727 (6.0)         | 20,006 (10.0)           | 556 (9.0)       | 579 (10.8)        | 4267 (7.7)         |
| Family history of CVD, No. (%)                  |                         |                 |                   |                    |                         |                 |                   |                    |
| Yes                                             | 24,711 (19.8)           | 1012 (24.0)     | 787 (25.7)        | 9552 (21.0)        | 38,417 (19.3)           | 1506 (24.4)     | 1231 (23.0)       | 12,179 (22.1)      |
| No                                              | 99,965 (80.2)           | 3198 (76.0)     | 2278 (74.3)       | 36,026 (79.0)      | 161,073 (80.7)          | 4677 (75.6)     | 4124 (77.0)       | 43,056 (77.9)      |

**Table S2.** Baseline characteristics of study participants according to myocardial infarction status

| Myocardial Infarction (MI)                      |                         |                 |                   |                    |                         |                 |                   |                    |
|-------------------------------------------------|-------------------------|-----------------|-------------------|--------------------|-------------------------|-----------------|-------------------|--------------------|
|                                                 | No                      |                 |                   |                    | Yes                     |                 |                   |                    |
|                                                 | Inactive<br>(n=124,676) | ≤50<br>(n=4210) | 51-99<br>(n=3065) | ≥100<br>(n=45,578) | Inactive<br>(n=199,490) | ≤50<br>(n=6183) | 51-99<br>(n=5355) | ≥100<br>(n=55,235) |
| Age, mean (SD), y                               | 50.4 (10.2)             | 51.2 (10.2)     | 51.6 (10.5)       | 54.8 (10.9)        | 49.7 (9.9)              | 50.3 (10.1)     | 51.2 (10.3)       | 53.9 (10.2)        |
| Urban residence, No. (%)                        | 45,496 (36.5)           | 2803 (66.6)     | 2057 (67.1)       | 26,516 (58.2)      | 71,212 (35.7)           | 4419 (71.5)     | 2901 (54.2)       | 37,711 (68.3)      |
| Body mass index, No. (%)                        |                         |                 |                   |                    |                         |                 |                   |                    |
| <18.5                                           | 4952 (4.0)              | 106 (2.5)       | 63 (2.1)          | 1668 (3.7)         | 8589 (4.3)              | 190 (3.1)       | 156 (2.9)         | 1663 (3.0)         |
| 18.5-24.9                                       | 82,323 (66.0)           | 2396 (56.9)     | 1802 (58.8)       | 28,289 (62.1)      | 125,609 (63.0)          | 3763 (60.8)     | 3354 (62.6)       | 32,741 (59.3)      |
| 25.0-29.9                                       | 33,868 (27.2)           | 1540 (36.6)     | 1086 (35.4)       | 14,187 (31.1)      | 56,522 (28.3)           | 1905 (30.8)     | 1594 (29.8)       | 17,773 (32.2)      |
| ≥30.0                                           | 3533 (2.8)              | 168 (4.0)       | 114 (3.7)         | 1434 (3.1)         | 8770 (4.4)              | 325 (5.3)       | 251 (4.7)         | 3058 (5.5)         |
| Systolic BP, mean (SD), mmHg                    | 131.9 (19.6)            | 131.6 (19.2)    | 131.5 (19.6)      | 132.9 (19.9)       | 129.2 (21.7)            | 125.8 (21.5)    | 128.7 (22.5)      | 129.5 (21.8)       |
| Diastolic BP, mean (SD), mmHg                   | 79.4 (11.4)             | 79.5 (11.3)     | 79.0 (11.2)       | 78.6 (11.2)        | 76.9 (10.6)             | 75.3 (10.8)     | 75.9 (11.2)       | 76.1 (10.7)        |
| Education level, No. (%)                        |                         |                 |                   |                    |                         |                 |                   |                    |
| No formal education                             | 11,454 (9.2)            | 99 (2.4)        | 93 (3.0)          | 2895 (6.3)         | 54,561 (27.3)           | 632 (10.2)      | 995 (18.6)        | 9400 (17.0)        |
| Primary school                                  | 42,009 (33.7)           | 800 (19.0)      | 610 (19.9)        | 13,428 (29.5)      | 65,377 (32.8)           | 1251 (20.2)     | 1366 (25.5)       | 15,151 (27.4)      |
| Middle or high school                           | 64,563 (51.8)           | 2582 (61.3)     | 1696 (55.3)       | 23,503 (51.6)      | 72,960 (36.6)           | 3476 (56.2)     | 2523 (47.1)       | 26,872 (48.7)      |
| College or university                           | 6651 (5.3)              | 729 (17.3))     | 666 (21.7)        | 5752 (12.6)        | 6592 (3.3)              | 824 (13.3)      | 471 (8.8)         | 3812 (6.9)         |
| Smoking status, No. (%)                         |                         |                 |                   |                    |                         |                 |                   |                    |
| Never                                           | 29,821 (23.9)           | 1356 (32.2)     | 977 (31.9)        | 13,898 (30.5)      | 194,204 (97.4)          | 6010 (97.2)     | 5193 (97.0)       | 53,725 (97.3)      |
| Former                                          | 16,545 (13.3)           | 686 (16.3)      | 531 (17.3)        | 8191 (18.0)        | 1362 (0.7)              | 59 (1.0)        | 62 (1.1)          | 550 (1.0)          |
| Current                                         | 78,310 (62.8)           | 2168 (51.5)     | 1557 (50.8)       | 23,489 (51.5)      | 3924 (1.9)              | 114 (1.8)       | 100 (1.9)         | 960 (1.7)          |
| Regular alcohol intake, No. (%)                 |                         |                 |                   |                    |                         |                 |                   |                    |
| Yes                                             | 44,098 (35.4)           | 1431 (34.0)     | 1025 (33.4)       | 14,302 (31.4)      | 3854 (1.9)              | 161 (2.6)       | 117 (2.2)         | 1263 (2.3)         |
| No                                              | 80,578 (64.6)           | 2779 (66.0)     | 2040 (66.6)       | 31,276 (68.6)      | 195,636 (98.1)          | 6022 (97.4)     | 5238 (97.8)       | 53,972 (97.7)      |
| Household income, yuan/yr, No. (%) <sup>b</sup> |                         |                 |                   |                    |                         |                 |                   |                    |
| <10,000                                         | 32,757 (26.3)           | 782 (18.6)      | 529 (17.3)        | 10,178 (22.3)      | 61,082 (30.6)           | 1263 (20.4)     | 1742 (32.5)       | 13,346 (24.1)      |
| 10,000-19,999                                   | 35,516 (28.5)           | 1171 (27.8)     | 849 (27.7)        | 12,638 (27.7)      | 59,230 (29.7)           | 1968 (31.8)     | 1505 (28.1)       | 16,219 (29.4)      |
| 20,000-34,999                                   | 31,067 (24.9)           | 1173 (27.9)     | 831 (27.1)        | 13,038 (28.6)      | 47,017 (23.6)           | 1648 (26.7)     | 1176 (22.0)       | 15,746 (28.5)      |
| ≥35,000                                         | 25,336 (20.3)           | 1084 (25.7)     | 856 (27.9)        | 9724 (21.3)        | 32,161 (16.1)           | 1304 (21.1)     | 932 (17.4)        | 9924 (18.0)        |
| Self-rated health status, No. (%)               |                         |                 |                   |                    |                         |                 |                   |                    |
| Excellent                                       | 26,538 (21.3)           | 889 (21.1)      | 780 (25.4)        | 9910 (21.7)        | 33,486 (16.8)           | 1123 (18.2)     | 795 (14.9)        | 9495 (17.2)        |
| Good/Fair                                       | 89,367 (71.7)           | 3022 (71.8)     | 2090 (68.2)       | 32,941 (72.3)      | 145,998 (73.2)          | 4504 (72.8)     | 3981 (74.3)       | 41,473 (75.1)      |
| Poor                                            | 8771 (7.0)              | 299 (7.1)       | 195 (6.4)         | 2727 (6.0)         | 20,006 (10.0)           | 556 (9.0)       | 579 (10.8)        | 4267 (7.7)         |
| Family history of CVD, No. (%)                  |                         |                 |                   |                    |                         |                 |                   |                    |
| Yes                                             | 24,711 (19.8)           | 1012 (24.0)     | 787 (25.7)        | 9552 (21.0)        | 38,417 (19.3)           | 1506 (24.4)     | 1231 (23.0)       | 12,179 (22.1)      |
| No                                              | 99,965 (80.2)           | 3198 (76.0)     | 2278 (74.3)       | 36,026 (79.0)      | 161,073 (80.7)          | 4677 (75.6)     | 4124 (77.0)       | 43,056 (77.9)      |

**Figure S1.** Flow of participants in the study.

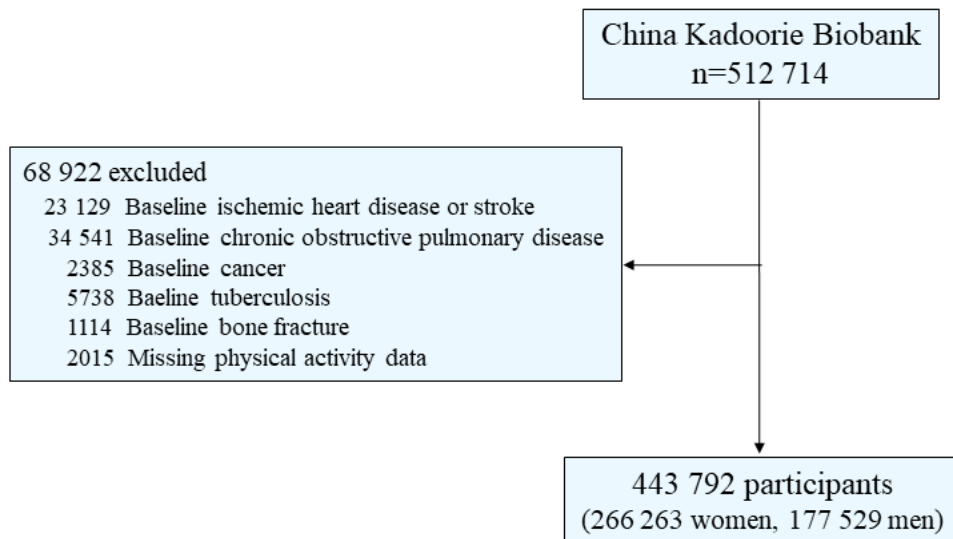

Supplement: s1 [file s1]
